# Supplementary material for: Health Risk Assessment of Heavy Metals from Smoked Corbicula fluminea Collected on Roadside Vendors at Kelantan, Malaysia
Source: Hindawi journal article supplement (doi:10.1155/2019/9596810), 2019-09-30
Supplement: f1 [file 9596810.f1.pdf]

15 **Graphical Abstract**

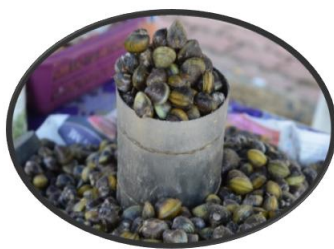

**Consumption is SAFE:**

- Provisional tolerable weekly intake
- Target hazard quotient
- Hazard index

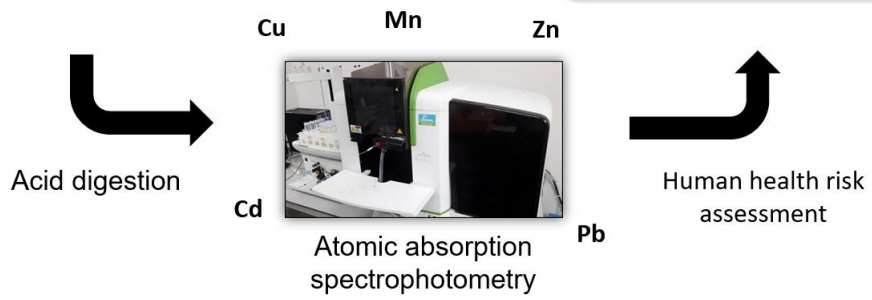

16  
17  
18
